# Supplementary material
Source: HighWire-hosted journal article supplement (https://bmjopen.bmj.com/content/15/1/e082145)
Supplement: inline-supplementary-material-1 [file inline-supplementary-material-1.pdf]

Table S1: Test effectiveness

|             | Method     | Base case | Lower range | Upper range | Beta Distribution | Source                   |
|-------------|------------|-----------|-------------|-------------|-------------------|--------------------------|
| Sensitivity | Co-testing | 0.937     | 0.925       | 0.948       | 687.212           | Li T. et. al, [52]       |
|             | Cytology   | 0.809     | 0.78        | 0.838       | 784.488           | Castanon A. et. al, [53] |
| Specificity | Co-testing | 0.858     | 0.855       | 0.860       | 1752558.838       | Li T. et. al, [52]       |
|             | Cytology   | 0.951     | 0.949       | 0.953       | 231302.993        | Li T. et. al, [52]       |
